# Supplementary material for: Characterization of Two Gonadal Genes, zar1 and wt1b, in Hermaphroditic Fish Asian Seabass (Lates calcarifer)
Source: MDPI journal article supplement (doi:10.3390/ani14030508), 2024-02-03
Supplement: s1 [file s1]

A

```

1      CGGTGGTTGAACAAAATGGCAACGTATGGTGAGGAGCCAGTCGACAGCTATTTCTATTCATCTTACAACCCCTTACATGGGAGATATCCCCGAGCTAAAGACGGGGGTGAAATATAA
1      M A T Y G E E P V D S Y F Y S S Y N P Y M G R Y P R A K D A G W K Y K
121    AAGTTATCTCTCCCACTACGGGGAGCTGATGCCTTTAAACAACGACGAGCGCTCAGCTCAAGTCCATCTTATCTCAAATCAACCCCAAACTACCCCGAGGCTCAGGAAGGCAAAACAC
36     S Y L S H Y G D T D A F N N Q Q R A Q L K S I L S Q I N P K L T P R L R K A N T
241    CAAAGATGTGGCTGTGCAGGTCAACCCGAAGAGGGAGCGCTCGGTACAGTGCTCCATCGGCCCGCGGACGCTCCTGTCCATGAAGAGGGACTTCCGGCGCAAAAGGAGGCAGGAGCCCGA
76     K D V A V Q V N P K R D A S V Q C S I G P R T L L S M K R D F R R K R R Q E P E
361    GACACCCGGCGGAGCGTCAGCCTCAGTGCGGCGGTGCGTGTGCGTTACCCCGGACCCCTCGCGGTACTCGCCTATCGCCTACAGAAGCGTCACCACCTTCCTGGTCGATGACAACAA
116    T P G G S V S L S A A V G V R Y P R T L A V Y S P I A Y R S V T T F L V D D N N
481    CAACAATAAGGAAGCCCCCTGTGGTGAGGCGAAGCCCGCAGAGCCGCCAGCGACCCGCCGAGTCTCGGGGAAAAGCGACGGGAAGAAGAGCGAATATACCCAAGCTGCTGAGGGTGA
156    N N K E A P C G E A K P A E P P S D P P E S A G K S D G K K S E Y T Q A A E G E
601    GAAGGCCGCTAAACAACGAGACCGAGCGAGAACTGAAGTCCAAACAGGCGAAGAGCGAAGATGCGCAGCTAACTACAGAGGGGTCAAAGGTCAAAGCGCGTGTGCGTTTCCAGTTTCT
196    K A A K Q R D Q R E K L K S K Q A K S E D A Q L T T E G S K V K A R V R F Q F L
721    GGAACAGAAGTACGGATATTACTACTGCAGAGAATGCAATCTACGATGGGAGAGTGCCATATGTGTGGTGGCTTCAGGGCACCACAAGGTTTACTTCAAGCAGTACTGTAGAAAATGCCA
236    E Q K Y G Y Y H C R E C N L R W E S A Y V W C V Q G T N K V Y F K Q Y C R K C Q
841    AAAGGACTTCAACCCATATCGTGTGAGGACATCATATGCCATCTTGAACAAAGCAGCTGTTCCTGTGCAATAACACAACGCCACGTCGACCTTAAACGGCCCCACAGACAGGACTT
276    K D F N P Y R V E D I T C H T C N K A R C S C A I T Q R H V D P K R P H R Q D L
961    GTGTGGCAGATGCAAAGGAAGCGGCTCTCCTGCGACAGCACTTTAGCTTCAAATACATCATCTGAAGGAGCACCTCCACTGAACCTTGCCTCCAATACATCAGTAAACGTCCTGTTGTG
316    C G R C K G K R L S C D S T F S F K Y I I *
1081   GAGGGGGCATATTTACAGATGCAATCATTCATCTTGGATGTAAAGATATATATTTGTACTTTATTTTCATGCCTGTTTGTGTTGATGAAATTGATGGTGAGAACCGCAC

```

B

```

1      ACTGTCTCAAACCGCCTTCATCA
24     ATGCTGACTGAGCCATATGGAGCCATGTCCATGGGGTCAGATGTTGAGATCTGACCCCTCCTAACTCCGGCGCGCCCGTGCCTCCTTGCCAGGAGCTGGCGCGGCTGTGGAATGTCC
1      M L T E P Y G A M S M G S D V R D L T L L T P A P P V P S L P G A G C G C M S
144    GTTGGCAGCGGGCAGTGGACCAACTGTGGACCTCCACCTGGCTCTCCCTACAGCTCCCTGCCCTCCACCACTCCCTCATCAAGCAGGAACCAAGTTGGGGGACCACCGACTCCATG
40     V G S G Q W T Q L L D L H P G S P Y S S L P S H H S L I K Q E P G W G T T D S M
264    GAGGACCTCACTGCGGACTCGGGCCTTCACAGTGCATTCTCAGGCCAGTTTACGGGGTCAGGCCCTGTGCGGTCGGGGCCTTTGGAGAACCACTACAGGTCAACCCAGGGTGTTT
80     E D P H C G L G A F T V H F S G Q F T G S G P C R V G A F G E P T T G Q P R V F
384    CCCAATGGAACCTACCTGCCCTGTGTGGACAGCCCCCTGCATCCAGGAACCAAGGGCTACGGAGCGGTGGGTTTAGACAGCAACCCAGTTACGGCCACACTCCGTCTCACCACGCCCCCT
120    P N G T Y L P C V D S P P A S C R N Q G Y G A V G L D S N P S Y G H T P S H H A P
504    CAGCTCTCCAGCTGTCTTCAAACATGAGGACACCTGTCACCGCCGAGCAACAGTAGTTGACCAGCAGTACCCGGCTCCTCCTCCATGTTTGGGCTGCCACAATCCTTCAGAATCCTGT
160    Q L S S L S F K H E D T L S P P S N I V D Q Q Y P A P P P M F G C H N P S E S C
624    CCAAGCAGCAAGCTCTGCTGCTGAGAACTACAACAGTGATAACGTATACCAAAATGCGTCTCAGCTGGAGTGTGAACATGGAACCAAAATGAACCCCTGGCGTCTTCCATGAAGAGC
200    P S S Q A L L L R N Y N S D N V Y Q M A S Q L E C V T W N Q M N T L A S S M K S
744    AGTGGCCATACAACAGCTATGACAGTGACCCACAGTCCCACCTCCACCCATGCTCGTCAGTGCGCAGTACCACATACATACACCGGTGCTTCAGGGGACTACAGGATGTCAGACGG
240    S G H T T S Y D S D P T V P P P P M L V S A Q Y H I H T H G V F R G L Q D V R R
864    GTACCTGGCATTGTCCACAGTTGTGAAGTCTCAGAGGCCAACGAGAAGCGTCCGTTTGTATGTGCTTATCCTGGCTGCAGCAAGAGATACTTCAAAGTGTACATCTGCAGATGCAT
280    V P G I A P P V V K S S E A N E K R P F V C A Y P G C S K R Y F K L S H L Q M H
984    GGCCGCAAAACACAGGAGAGAAGCCCTACCAAGTGTGATTTCACAGACTGCGGCCGAGATTCTCTCGTCTCAGCCAGTTAAAGAGGCACCAGCGAGACACAGGAGTGAAGCCCTTT
320    G R K H T G E K P Y Q C D F T D C G R R F S R S D Q L K R H Q R R H T G V K P F
1104   CAGTGGCAGACGTGTCAGAGAAAGTTTTCACGGTCAGATCATCTTAAGACGCACACTCGGACTCATACAGGTGAGAAGCCCTTTACCTGCGCTGGTCCAAGTGTGAGAAGAAGTTTGCC
360    Q C E T C Q R K F S R S D H L K T H T R T H T G E K P F T C R W S N C Q K K F A
1224   CGCTCTGACGAGCTGGTGCGCCACCACAGCATGCACCAGAGGAACCTGACCAAGCTGCAGCCTGCCATCTGAAGCAGCGAGCGAGAGGAGGAGGACGAAGAGGAAGGTGACAATATGT
400    R S D E L V R H H S M H Q R N L T K L Q P A I *
1344   TGTGCCAGCTAGTGAAGAGAGGGATGCTTGAGCCTGGTCAGCAGTTGCGGTGCCCTTGTACAGACTCGTGAAGTGGTGAGCAGCTGAGGCCCTCCCTCAGCCAGGCAGACAACGTCAG
1454   GAGAGAACACACTCGCTGGTGCTCCACCGATTAAAGATGCACCTCAACTAGTGCTTGAATCACTAGT

```

**Figure S1 The cDNA sequences and predicted peptides of *Lczar1* (A) and *Lcwt1b* (B)**

Grey shadow: Zinc-binding domain in (A), and Zn-finger domain in (B). Stop codon is labeled with an asterisk (\*).
